# Supplementary material
Source: PubMed Central journal article supplement (PMC6535092)
Supplement: NIHMS1013975-supplement-SI.pdf [file NIHMS1013975-supplement-SI.pdf]

## Supporting Information

### **Rapid phenotyping of cancer stem cells using multichannel nanosensor arrays**

Yingying Geng<sup>a</sup>, Hira L. Goel, PhD<sup>b</sup>, Ngoc B. Le, PhD<sup>c</sup>, Tatsuyuki Yoshii, PhD<sup>c, 1</sup>, Rubul Mout, PhD<sup>c</sup>, Gulen Y. Tonga, PhD<sup>c, 2</sup>, John J. Amante<sup>b</sup>, Arthur M. Mercurio, PhD<sup>b</sup>, Vincent M. Rotello, PhD<sup>c, \*</sup>

<sup>a</sup>*Molecular and Cellular Biology Program, University of Massachusetts, Amherst, MA 01003, U.S.A.*

<sup>b</sup>*Department of Molecular, Cell and Cancer Biology, University of Massachusetts Medical School, Worcester, MA 01605, U.S.A.*

<sup>c</sup>*Department of Chemistry, University of Massachusetts, Amherst, MA 01003, U.S.A.*

\* Correspondence should be addressed to V.R. ([rotello@chem.umass.edu](mailto:rotello@chem.umass.edu))

### **Table of contents**

---

<sup>1</sup> Department of Life Science of Applied Chemistry, Nagoya Institute of Technology, Gokiso-cho, Showa-ku, Nagoya 466-8555, Japan

<sup>2</sup> Department of Anaesthesia, Boston Children's Hospital, 300 Longwood Ave., Boston MA 02115, U.S.A.

|           |                                                                            |               |
|-----------|----------------------------------------------------------------------------|---------------|
| <b>1.</b> | <b>Synthesis benzyl ligand-functionalized gold nanoparticles (BenzNPs)</b> | <b>P3</b>     |
| <b>2.</b> | <b>Characterization of BenzNP</b>                                          | <b>P3-4</b>   |
| <b>3.</b> | <b>Fluorescence bar graphs</b>                                             | <b>P5-6</b>   |
| <b>4.</b> | <b>Normalized fluorescence responses and LDA output data</b>               | <b>P6-11</b>  |
| <b>5.</b> | <b>Jackknifed analysis of the fluorescence responses</b>                   | <b>P11</b>    |
| <b>6.</b> | <b>Hierarchical clustering analysis</b>                                    | <b>P11-13</b> |
| <b>7.</b> | <b>Identification of unknown samples</b>                                   | <b>P13-16</b> |
| <b>8.</b> | <b>Importance of each fluorescent channel</b>                              | <b>P16-17</b> |

### 1. Benzyl ligand-functionalized gold nanoparticles (BenzNPs)

Reported procedures in literature were followed to synthesize Benzyl ligand and BenzNPs (1-4). Briefly, Brust-Schiffrin two-phase synthesis method was used to synthesize pentanethiol-protected AuNPs (C5-AuNPs) with core diameter ca. 2 nm (5,6). To obtain benzyl ligand functionalized NPs (BenzNPs), Murray place-exchange method (7) was followed. C5-AuNPs (20 mg) and thiol ligand (60 mg) were dissolved in a mixture of dry DCM (6 mL) and methanol (2 mL) and stirred under N<sub>2</sub> atmosphere for 3 days at room temperature. After place exchange, solvents were removed under reduced pressure and the resulting precipitate was washed with hexane (15 mL) three times, hexane:DCM (v/v, 1/1, 16 mL) three times, and DCM (15 mL) twice. After that, the precipitate was dissolved in distilled water (~ 8 mL) and dialyzed for three days (membrane molecular weight cut-off =10,000, volume of the dialysis bucket is ~5 L) to remove excess ligands, pentanethiol, acetic acid, and other salts present in the nanoparticle solution. After dialysis, the particle was lyophilized to yield a solid product. The particles were then re-dispersed in deionized water. <sup>1</sup>H NMR-spectra in D<sub>2</sub>O showed substantial broadening of the proton peaks with no sign of free ligands. The presence of ligands on AuNPs was also confirmed by mass spectroscopy.

### 2. Characterization of BenzNP

**Matrix-assisted laser desorption/ionization mass spectrometry (MALDI-MS).** MALDI-MS has been performed to characterize the surface ligand on the BenzNPs (8). A saturated  $\alpha$ -Cyano-4-hydroxycinnamic acid ( $\alpha$ -CHCA) stock solution was prepared in 70% acetonitrile, 30% H<sub>2</sub>O, and 0.1% trifluoroacetic acid. An equal volume of 2  $\mu$ M BenzNP solution was added to the matrix stock solution. 2.5 L of this mixture was applied to the sample carrier, and then the MALDI-MS analysis was performed on a Bruker Autoflex III mass spectrometer. The molecular ions of Benzyl ligand were detected at m/z 498, and the disulfide ion formed between the benzyl ligand and the original pentanethiol was also detected at m/z 600.

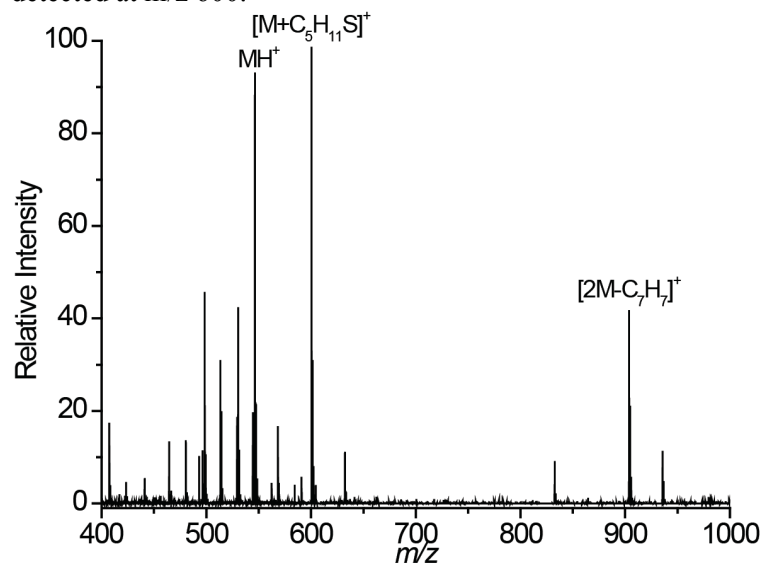

Figure S1. MALDI-MS spectrum of BenzNPs.

### <sup>1</sup>H NMR spectrum



### 3. Fluorescence bar graphs

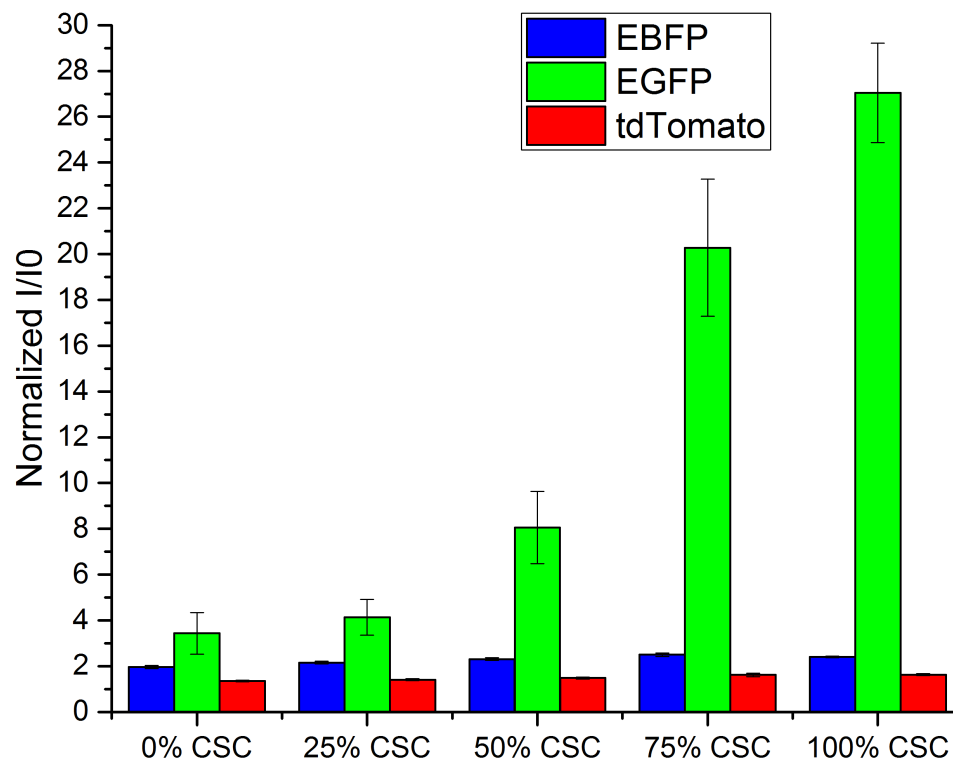

**Figure S4. Fluorescent responses of CSC and non-CSC mixture from the engineered S1 system using BenzNP-FP nanosensor.** Normalized fluorescent intensities against sensor only ( $I/I_0$ ) were obtained with BenzNP-FP nanosensor against different ratios of the CSCs and non-CSCs from S1 cells ( $n = 8$ ).

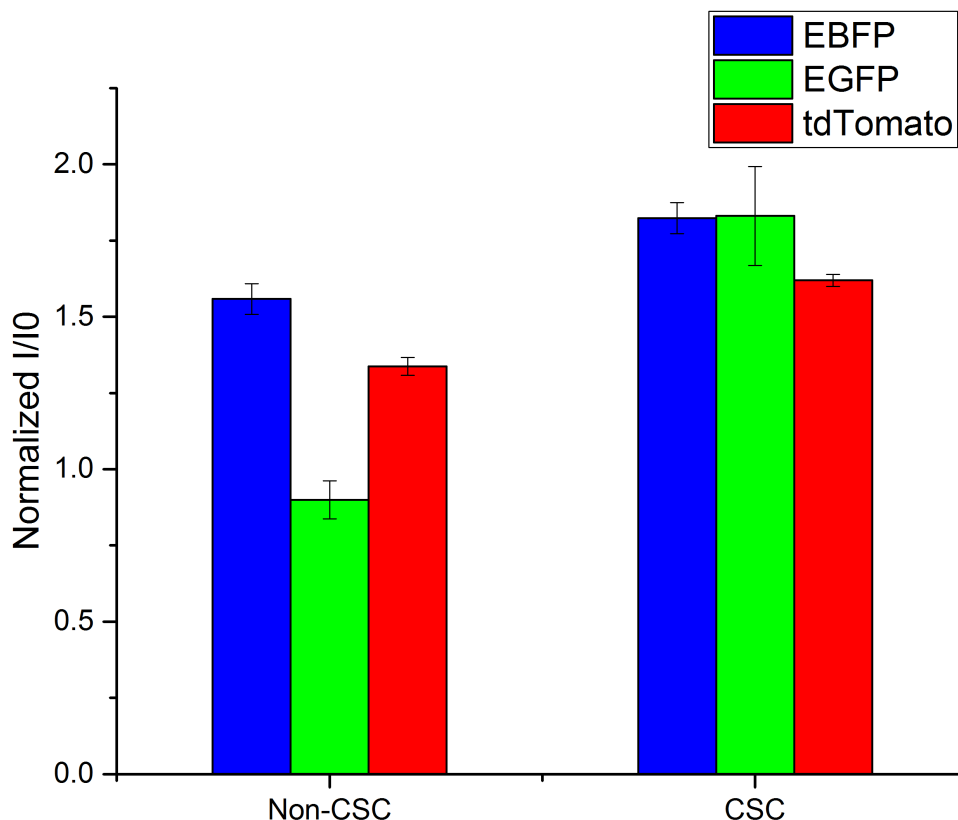

**Figure S5. Fluorescent responses of non-CSC and CSC group isolated from the patient-derived xenografts using BenzNP-FP nanosensor.** Normalized fluorescent intensities against sensor only ( $I/I_0$ ) were obtained ( $n = 8$ ).

#### 4. Normalized fluorescence responses and LDA output data

Fluorescence intensity of each channel was normalized against sensor only ( $I/I_0$ ) and used for LDA analysis. In LDA, measured fluorescent responses were transformed to generate canonical discriminants that best maximize the distance between classes relative to the variation within the classes. Each data input in the analysis is then reduced to a single score using the discriminants and plotted in a new space, called LDA solution space. At the end of analysis, LDA separates classes of objects into distinct groups, which are shown in the canonical plot. More details of the analysis could be found in the literature (9).

**Table S1. Normalized fluorescence responses and LDA output for CSC and non-CSC mixture from the MCF-10A ER-*Src* system.** Score (1) and score (2) correspond to Fig. 2 in the main text.

| Sample name | $I/I_0$  |          |          | LDA output |           |           |
|-------------|----------|----------|----------|------------|-----------|-----------|
|             | EBFP     | EGFP     | tdTomato | Score (1)  | Score (2) | Score (3) |
| 0% CSC      | 1.817865 | 2.571088 | 1.543197 | 6.035518   | 0.815081  | -1.116892 |

|          |          |           |          |           |           |           |
|----------|----------|-----------|----------|-----------|-----------|-----------|
| 0% CSC   | 1.877957 | 3.597334  | 1.576064 | 4.875273  | 1.723847  | -0.591839 |
| 0% CSC   | 1.853246 | 3.187297  | 1.627913 | 4.645387  | -1.272182 | -1.037974 |
| 0% CSC   | 1.893202 | 3.119675  | 1.603582 | 5.493806  | 0.879185  | -0.248070 |
| 0% CSC   | 1.937026 | 3.486669  | 1.660884 | 4.872620  | 0.044842  | 0.162784  |
| 0% CSC   | 1.937280 | 2.923962  | 1.652830 | 5.810772  | 0.144158  | 0.405962  |
| 0% CSC   | 1.891855 | 2.577243  | 1.659455 | 5.707937  | -1.630782 | -0.260530 |
| 0% CSC   | 1.951027 | 2.886411  | 1.686218 | 5.684131  | -0.800036 | 0.538873  |
| 25% CSC  | 1.815277 | 3.455055  | 1.608589 | 3.979070  | -1.526568 | -1.718327 |
| 25% CSC  | 1.879651 | 3.264141  | 1.655565 | 4.561543  | -1.558069 | -0.712575 |
| 25% CSC  | 1.951227 | 3.755545  | 1.635729 | 4.905596  | 1.593743  | 0.390670  |
| 25% CSC  | 1.971403 | 4.419992  | 1.693186 | 3.543490  | 0.164896  | 0.286667  |
| 25% CSC  | 1.916584 | 3.435186  | 1.673797 | 4.563710  | -1.110001 | -0.210669 |
| 25% CSC  | 2.030952 | 4.048030  | 1.763659 | 4.092707  | -1.030763 | 1.197015  |
| 25% CSC  | 2.057281 | 4.972833  | 1.794968 | 2.688262  | -1.116267 | 1.190464  |
| 25% CSC  | 2.128230 | 6.493353  | 1.797440 | 1.234702  | 1.544462  | 1.820022  |
| 50% CSC  | 1.934003 | 7.297329  | 1.678799 | -1.110540 | 0.805232  | -1.379783 |
| 50% CSC  | 1.998554 | 7.126077  | 1.725433 | -0.551983 | 0.800948  | -0.377194 |
| 50% CSC  | 2.010963 | 7.587152  | 1.736926 | -1.217612 | 0.902178  | -0.378474 |
| 50% CSC  | 2.007442 | 6.653028  | 1.732638 | 0.195721  | 0.583459  | -0.073290 |
| 50% CSC  | 2.037541 | 6.693281  | 1.763118 | 0.182639  | 0.279864  | 0.318988  |
| 50% CSC  | 2.097015 | 7.492101  | 1.822550 | -0.921556 | 0.008526  | 0.827073  |
| 50% CSC  | 2.117329 | 8.760666  | 1.876474 | -3.157455 | -1.025044 | 0.511043  |
| 50% CSC  | 2.142849 | 8.762654  | 1.865720 | -2.734278 | 0.175270  | 0.982079  |
| 75% CSC  | 1.991160 | 8.282214  | 1.721532 | -2.348245 | 1.212182  | -0.923264 |
| 75% CSC  | 1.968108 | 9.248002  | 1.723889 | -4.114830 | 0.822621  | -1.686247 |
| 75% CSC  | 2.057312 | 8.594579  | 1.761937 | -2.435092 | 1.705772  | -0.053289 |
| 75% CSC  | 1.950658 | 8.308941  | 1.725859 | -2.930746 | -0.168442 | -1.638059 |
| 75% CSC  | 2.130475 | 7.321027  | 1.827359 | -0.303591 | 0.750681  | 1.444512  |
| 75% CSC  | 2.115066 | 9.305848  | 1.833830 | -3.559438 | 0.845743  | 0.415294  |
| 75% CSC  | 2.148668 | 8.292792  | 1.853676 | -1.826109 | 0.640594  | 1.299018  |
| 75% CSC  | 2.149504 | 7.879390  | 1.870226 | -1.365711 | -0.169966 | 1.411146  |
| 100% CSC | 1.982202 | 10.215631 | 1.758995 | -5.773980 | 0.234332  | -1.930358 |
| 100% CSC | 2.036678 | 9.964893  | 1.801886 | -5.179397 | 0.044779  | -1.056620 |

|          |          |           |          |           |           |           |
|----------|----------|-----------|----------|-----------|-----------|-----------|
| 100% CSC | 2.160530 | 10.619534 | 1.876826 | -5.440018 | 1.026159  | 0.548438  |
| 100% CSC | 2.077684 | 9.621597  | 1.857655 | -4.745843 | -1.105569 | -0.422079 |
| 100% CSC | 2.167733 | 10.309326 | 1.913087 | -5.265232 | -0.342715 | 0.662224  |
| 100% CSC | 2.151665 | 10.722718 | 1.943721 | -6.409637 | -1.886629 | 0.127727  |
| 100% CSC | 2.169244 | 10.260940 | 1.955830 | -5.624084 | -2.035223 | 0.558507  |
| 100% CSC | 2.187815 | 10.751325 | 1.948257 | -6.057505 | -0.970295 | 0.717029  |

**Table S2. Normalized fluorescence responses and LDA output for CSC, non-CSC, and de-CSC groups from the S1 system.** Score (1), and score (2) correspond to Fig. 4a in the main text.

| Sample name | I/I <sub>0</sub> |          |          | LDA output |           |
|-------------|------------------|----------|----------|------------|-----------|
|             | EBFP             | EGFP     | tdTomato | Score (1)  | Score (2) |
| Non-CSC     | 2.12363          | 2.89472  | 1.44655  | 4.92438    | 0.22478   |
| Non-CSC     | 2.12705          | 3.03057  | 1.42358  | 5.07213    | 0.58905   |
| Non-CSC     | 2.01352          | 2.18519  | 1.40060  | 5.43533    | -1.20956  |
| Non-CSC     | 2.23732          | 4.05547  | 1.51209  | 3.70867    | 1.43119   |
| Non-CSC     | 2.14893          | 3.02788  | 1.55671  | 3.65838    | -0.78265  |
| Non-CSC     | 2.16583          | 2.44019  | 1.46911  | 5.47335    | 0.76117   |
| Non-CSC     | 2.18345          | 2.46521  | 1.50439  | 5.15827    | 0.62180   |
| Non-CSC     | 2.24590          | 3.65487  | 1.49484  | 4.42022    | 1.85637   |
| CSC         | 2.44737          | 14.37155 | 1.90014  | -10.74314  | -0.52859  |
| CSC         | 2.48668          | 15.77496 | 1.81416  | -10.98282  | 1.27598   |
| CSC         | 2.38455          | 14.10910 | 1.81482  | -9.90788   | -0.56266  |
| CSC         | 2.35731          | 13.49822 | 1.83447  | -9.66795   | -1.30262  |
| CSC         | 2.53000          | 12.57462 | 1.93750  | -8.58412   | 0.68002   |
| CSC         | 2.46262          | 12.26964 | 1.89071  | -8.19300   | 0.04364   |
| CSC         | 2.57623          | 13.52768 | 1.97121  | -9.69438   | 1.04024   |
| CSC         | 2.53310          | 15.38998 | 2.03550  | -12.83783  | -0.78499  |
| De-CSC      | 2.22196          | 3.54636  | 1.51302  | 4.14647    | 1.16237   |
| De-CSC      | 2.09805          | 2.52856  | 1.39384  | 5.76450    | 0.47157   |
| De-CSC      | 2.01011          | 2.49832  | 1.40419  | 5.02097    | -1.34601  |
| De-CSC      | 1.93891          | 2.00929  | 1.34375  | 5.74932    | -1.85816  |
| De-CSC      | 2.12216          | 2.05062  | 1.43482  | 5.98629    | 0.41631   |



|        |         |         |         |         |          |
|--------|---------|---------|---------|---------|----------|
| De-CSC | 2.07704 | 1.86363 | 1.46871 | 5.45543 | -0.88791 |
| De-CSC | 2.12702 | 1.96935 | 1.49530 | 5.39476 | -0.29813 |
| De-CSC | 2.10250 | 1.73142 | 1.51493 | 5.24263 | -1.01323 |

**Table S3. Normalized fluorescence responses and LDA output for CSC and non-CSC mixture from the S1 system.** Score (1), score (2) and score (3) correspond to Fig. 4b in the main text.

| Sample name | I/I <sub>0</sub> |          |          | LDA output |           |           |
|-------------|------------------|----------|----------|------------|-----------|-----------|
|             | EBFP             | EGFP     | tdTomato | Score (1)  | Score (2) | Score (3) |
| 0% CSC      | 1.927829         | 2.280813 | 1.382625 | -6.254980  | -3.264813 | -1.160907 |
| 0% CSC      | 2.015818         | 3.814123 | 1.405952 | -5.1804    | -2.04917  | -0.8603   |
| 0% CSC      | 1.894175         | 3.006865 | 1.325646 | -5.92037   | -3.7247   | 0.16316   |
| 0% CSC      | 1.976269         | 3.100487 | 1.337187 | -5.55608   | -2.14282  | 0.491984  |
| 0% CSC      | 1.934918         | 3.012791 | 1.353656 | -5.8052    | -3.09893  | -0.25028  |
| 0% CSC      | 1.99233          | 3.705166 | 1.356275 | -5.23015   | -2.12417  | 0.219186  |
| 0% CSC      | 1.884859         | 3.209683 | 1.317727 | -5.84293   | -3.91262  | 0.329     |
| 0% CSC      | 2.070647         | 5.336487 | 1.376016 | -4.14016   | -1.108    | 0.555414  |
| 25% CSC     | 2.211207         | 5.213129 | 1.436473 | -3.73965   | 1.367433  | 0.031804  |
| 25% CSC     | 2.225454         | 4.909753 | 1.497276 | -3.95448   | 1.280287  | -1.46671  |
| 25% CSC     | 2.167979         | 3.963315 | 1.396236 | -4.45346   | 1.127627  | 0.541268  |
| 25% CSC     | 2.227722         | 4.703979 | 1.413107 | -3.87409   | 2.02816   | 0.67106   |
| 25% CSC     | 2.099328         | 4.208876 | 1.371428 | -4.56737   | -0.16873  | 0.705794  |
| 25% CSC     | 2.056839         | 2.876339 | 1.350324 | -5.35808   | -0.51681  | 0.717962  |
| 25% CSC     | 2.119984         | 3.542361 | 1.433016 | -4.93618   | -0.02909  | -0.82317  |
| 25% CSC     | 2.132413         | 3.672445 | 1.398216 | -4.74901   | 0.45805   | 0.180288  |
| 50% CSC     | 2.294439         | 8.244357 | 1.50777  | -2.04453   | 1.703754  | -0.69143  |
| 50% CSC     | 2.351831         | 9.255812 | 1.564005 | -1.42206   | 2.179603  | -1.54318  |
| 50% CSC     | 2.28559          | 5.912176 | 1.45326  | -3.11968   | 2.582553  | 0.265733  |
| 50% CSC     | 2.33778          | 8.906347 | 1.468003 | -1.45622   | 2.720587  | 0.753353  |
| 50% CSC     | 2.307862         | 10.63157 | 1.426227 | -0.64452   | 1.945414  | 1.875474  |
| 50% CSC     | 2.343071         | 7.369459 | 1.467797 | -2.19159   | 3.256174  | 0.552753  |
| 50% CSC     | 2.178894         | 6.185306 | 1.448612 | -3.41968   | 0.338295  | -0.36353  |
| 50% CSC     | 2.362341         | 7.898417 | 1.522657 | -1.96292   | 3.088279  | -0.62368  |
| 75% CSC     | 2.61412          | 17.98517 | 1.700067 | 3.695498   | 4.145011  | -1.68606  |

|          |          |          |          |          |          |          |
|----------|----------|----------|----------|----------|----------|----------|
| 75% CSC  | 2.548706 | 24.12151 | 1.643194 | 6.565398 | 1.533054 | 0.262522 |
| 75% CSC  | 2.51909  | 22.35307 | 1.613422 | 5.631098 | 1.637716 | 0.522504 |
| 75% CSC  | 2.499048 | 22.1025  | 1.556952 | 5.539775 | 1.725043 | 1.778787 |
| 75% CSC  | 2.370701 | 14.40664 | 1.463052 | 1.403079 | 1.918667 | 2.001623 |
| 75% CSC  | 2.438336 | 20.17128 | 1.662395 | 4.118778 | 0.197447 | -1.6779  |
| 75% CSC  | 2.498401 | 19.97131 | 1.641533 | 4.312975 | 1.653326 | -0.73023 |
| 75% CSC  | 2.522878 | 21.0975  | 1.674161 | 4.903347 | 1.598116 | -1.20385 |
| 100% CSC | 2.436318 | 24.53319 | 1.623508 | 6.340826 | -0.75203 | -0.0021  |
| 100% CSC | 2.438839 | 22.94076 | 1.59714  | 5.620131 | -0.05808 | 0.437348 |
| 100% CSC | 2.361345 | 27.03728 | 1.590033 | 7.332001 | -2.73678 | 0.697516 |
| 100% CSC | 2.3543   | 28.79826 | 1.566125 | 8.219954 | -3.186   | 1.537888 |
| 100% CSC | 2.41953  | 27.79243 | 1.643489 | 7.837091 | -2.15244 | -0.11811 |
| 100% CSC | 2.393368 | 27.89005 | 1.648199 | 7.76666  | -2.75597 | -0.4172  |
| 100% CSC | 2.413503 | 28.65629 | 1.680892 | 8.161339 | -2.80191 | -0.98212 |
| 100% CSC | 2.458712 | 28.71857 | 1.68304  | 8.37586  | -1.90154 | -0.69167 |

**Table S4. Normalized fluorescence responses and LDA output for CSC and non-CSC groups isolated from the PDX samples.** Score (1) and score (2) correspond to Fig. 5c in the main text. Different sample sizes (n = 8 for non-CSC and n = 6 for CSC) are due to the scarcity of isolated CSCs from PDX samples.

| Sample name | I/I <sub>0</sub> |          |          | LDA output |           |
|-------------|------------------|----------|----------|------------|-----------|
|             | EBFP             | EGFP     | tdTomato | Score (1)  | Score (2) |
| Non-CSC     | 1.636849         | 0.92968  | 1.359301 | 5.291044   | 0.487366  |
| Non-CSC     | 1.619845         | 0.999395 | 1.344677 | 4.623209   | 0.389741  |
| Non-CSC     | 1.587549         | 0.978464 | 1.325545 | 4.807328   | 0.071918  |
| Non-CSC     | 1.577691         | 0.943424 | 1.347194 | 4.184204   | -0.39109  |
| Non-CSC     | 1.506717         | 0.863826 | 1.288606 | 5.584475   | -0.87542  |
| Non-CSC     | 1.477156         | 0.806908 | 1.291248 | 5.448338   | -1.43668  |
| Non-CSC     | 1.567925         | 0.857513 | 1.321228 | 5.899989   | -0.23062  |
| Non-CSC     | 1.528191         | 0.848237 | 1.362723 | 3.546835   | -1.47735  |
| Non-CSC     | 1.553219         | 0.857804 | 1.365521 | 3.922945   | -1.0732   |
| Non-CSC     | 1.527163         | 0.908992 | 1.365989 | 2.701327   | -1.53118  |
| CSC         | 1.866588         | 1.747248 | 1.635223 | -8.87459   | 0.984683  |
| CSC         | 1.853689         | 2.050124 | 1.62956  | -12.4664   | 0.869076  |

|     |          |          |          |          |          |
|-----|----------|----------|----------|----------|----------|
| CSC | 1.86197  | 1.951221 | 1.63178  | -11.2114 | 0.973441 |
| CSC | 1.774863 | 1.664615 | 1.612887 | -9.25993 | -0.34286 |
| CSC | 1.76247  | 1.741178 | 1.587472 | -9.50174 | -0.21629 |

## 5. Jackknifed analysis of the fluorescence responses

Jackknifed classification or leave-one-out cross validation is performed to assess the quality and reliability of the sensor array. The procedure begins by leaving out one sample at a time and uses the rest of the data as a training set to generate the linear discriminant function. The function is then used to categorize the excluded sample into the correct cluster. This process is repeated for all data points. The results from the Jackknifed analysis are listed below (Table S5 – S6).

**Table S5. Percentage of accurate classification among different CSC mixtures from the MCF-10A ER-Src system using Jackknifed analysis.** The results show an overall 100% correct classification.

|          | 0% CSC | 50% CSC | 100% CSC | % correct |
|----------|--------|---------|----------|-----------|
| 0% CSC   | 8      | 0       | 0        | 100       |
| 50% CSC  | 0      | 8       | 0        | 100       |
| 100% CSC | 0      | 0       | 8        | 100       |
| Total    | 8      | 8       | 8        | 100       |

**Table S6. Percentage of accurate classification among different CSC mixtures from the S1 cell model using Jackknifed analysis.** The results show no overlap between the analyzed groups, indicating that all cases are classified into the correct groups.

|          | 0% CSC | 50% CSC | 100% CSC | % correct |
|----------|--------|---------|----------|-----------|
| 0% CSC   | 8      | 0       | 0        | 100       |
| 50% CSC  | 0      | 8       | 0        | 100       |
| 100% CSC | 0      | 0       | 8        | 100       |
| Total    | 8      | 8       | 8        | 100       |

## 6. Hierarchical clustering analysis

To ensure the accuracy of the data clustering, we employed another method, Hierarchical clustering analysis (HCA), on our data set. HCA of the average data set was performed using the *hclust* function of the stats package of R assuming a complete linkage method (10). *hclust* begins with each case serving as its own cluster. During each processing step, the two most similar cases or clusters are joined. The step-wise analysis iterates until all cases fall into a single cluster. The results from the HCA approach are listed below (Figure S6-S8).

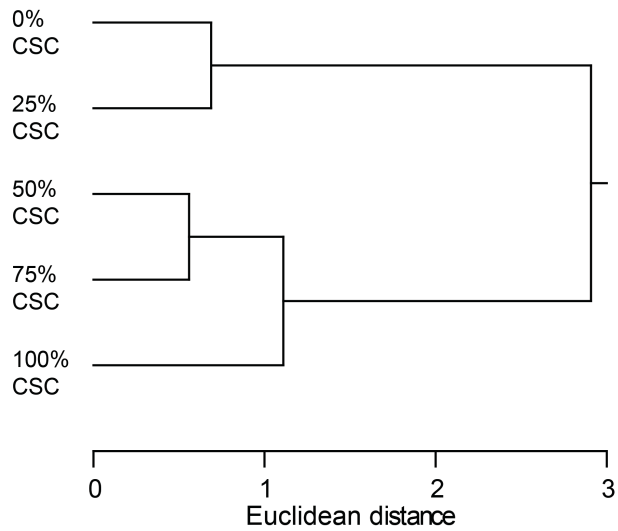

**Figure S6.** The dendrogram derived from unsupervised HCA using average fluorescence responses in five different MCF-10A ER-Src mixture samples (n=8). Analysis was carried out using average linkage method, where the distance metric is Euclidean distance. A similar trend is observed as the one in the LDA plot from Figure 2 in the main text.

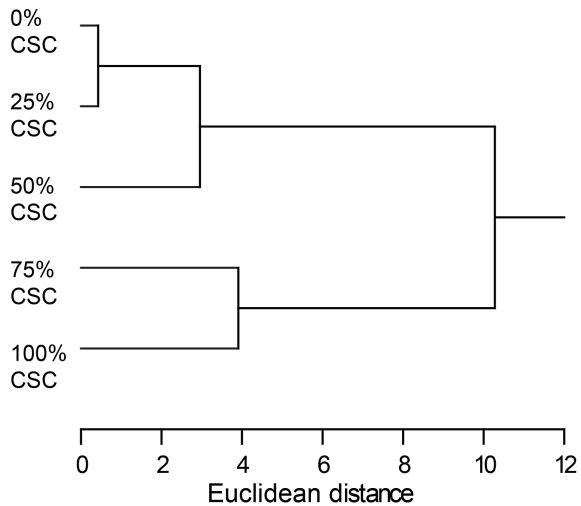

**Figure S7.** The dendrogram derived from unsupervised HCA using average fluorescence responses in five different S1 mixture samples (n=8). Analysis was carried out using average linkage method, where the distance metric is Euclidean distance. A similar trend is observed as the one in the LDA plot from Figure 4b in the main text.

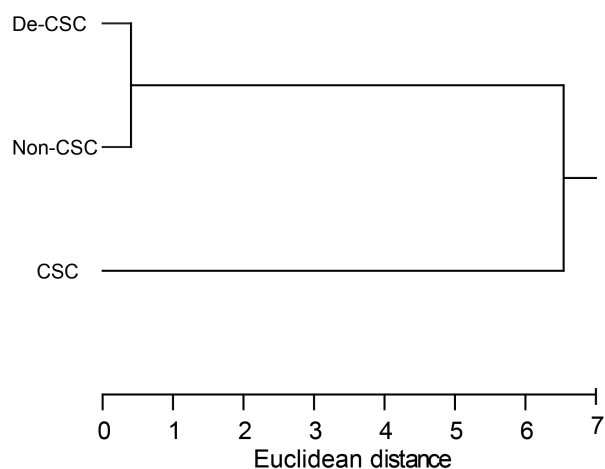

**Figure S8.** The dendrogram derived from unsupervised HCA using average fluorescence responses in three S1 cell lines (n=8). Analysis was carried out using average linkage method, where the distance metric is Euclidean distance. A similar trend is observed as the one in the LDA plot from Figure 4a in the main text.

### 7. Identification of unknown samples

Unknown or blinded samples were identified first by converting their normalized fluorescence responses to canonical scores using the discriminant functions established from the reference set. Then, Mahalanobis distance (11,12) of that case to the centroid of each training cluster in the LDA space was computed. Blinded cases were predicted to belong to the closest group, defined by the shortest Mahalanobis distance. The results from the unknown identification are listed below (Table S7 – S10).

**Table S7. Unknown identification of three blinded CSC mixtures in MCF-10A ER-*Src* system from the training set (Figure 2 and Table S1).** The results show an overall 96% correct unknown identification with only one case from 0% CSC misidentified as 50% CSC.

| Unknown sample # | $I/I_0$  |          |          | True ID | Identified as | Correct prediction |
|------------------|----------|----------|----------|---------|---------------|--------------------|
|                  | EBFP     | EGFP     | tdTomato |         |               |                    |
| 1                | 1.754519 | 3.423045 | 1.501593 | 0% CSC  | 0% CSC        | yes                |
| 2                | 1.76912  | 4.862428 | 1.535601 | 0% CSC  | 50% CSC       | no                 |
| 3                | 1.848319 | 4.453536 | 1.547369 | 0% CSC  | 0% CSC        | yes                |
| 4                | 1.878453 | 4.930182 | 1.619786 | 0% CSC  | 0% CSC        | yes                |
| 5                | 1.913332 | 3.773694 | 1.602403 | 0% CSC  | 0% CSC        | yes                |
| 6                | 1.944757 | 4.835558 | 1.616316 | 0% CSC  | 0% CSC        | yes                |
| 7                | 2.001841 | 4.817133 | 1.658191 | 0% CSC  | 0% CSC        | yes                |
| 8                | 1.98959  | 4.835699 | 1.676257 | 0% CSC  | 0% CSC        | yes                |
| 9                | 1.810397 | 5.443651 | 1.571686 | 50% CSC | 50% CSC       | yes                |
| 10               | 1.819309 | 4.933177 | 1.541244 | 50% CSC | 50% CSC       | yes                |
| 11               | 1.90041  | 5.164846 | 1.590407 | 50% CSC | 50% CSC       | yes                |
| 12               | 1.891537 | 6.44706  | 1.677087 | 50% CSC | 50% CSC       | yes                |
| 13               | 1.953976 | 6.660632 | 1.74388  | 50% CSC | 50% CSC       | yes                |

|    |          |          |          |          |          |     |
|----|----------|----------|----------|----------|----------|-----|
| 14 | 1.939982 | 6.803571 | 1.728521 | 50% CSC  | 50% CSC  | yes |
| 15 | 1.96229  | 6.756974 | 1.757715 | 50% CSC  | 50% CSC  | yes |
| 16 | 2.006735 | 6.426179 | 1.747898 | 50% CSC  | 50% CSC  | yes |
| 17 | 1.805842 | 11.94979 | 1.849768 | 100% CSC | 100% CSC | yes |
| 18 | 1.901518 | 11.80875 | 1.919809 | 100% CSC | 100% CSC | yes |
| 19 | 1.888191 | 10.17209 | 1.863975 | 100% CSC | 100% CSC | yes |
| 20 | 1.950687 | 12.00072 | 1.946979 | 100% CSC | 100% CSC | yes |
| 21 | 2.118642 | 11.57802 | 1.962532 | 100% CSC | 100% CSC | yes |
| 22 | 1.957026 | 11.80334 | 1.99206  | 100% CSC | 100% CSC | yes |
| 23 | 1.971589 | 11.67191 | 2.014595 | 100% CSC | 100% CSC | yes |
| 24 | 1.991975 | 11.60949 | 2.035304 | 100% CSC | 100% CSC | yes |

**Table S8. Unknown identification of blinded CSCs, Non-CSCs and De-CSCs in S1 system from the training set (Figure 4a and Table S2).** Due to the similar nature between Non-CSCs and De-CSCs, they are named as one group Non/De-CSC for unknown identification studies. The results show an overall 100% accurate unknown identification.

| Unknown sample # | I/I <sub>0</sub> |          |          | True ID    | Identified as | Correct prediction |
|------------------|------------------|----------|----------|------------|---------------|--------------------|
|                  | EBFP             | EGFP     | tdTomato |            |               |                    |
| 1                | 1.983416         | 2.448272 | 1.399256 | Non/De-CSC | Non/De-CSC    | yes                |
| 2                | 1.949518         | 2.514552 | 1.337073 | Non/De-CSC | Non/De-CSC    | yes                |
| 3                | 1.901489         | 2.164027 | 1.296893 | Non/De-CSC | Non/De-CSC    | yes                |
| 4                | 1.858121         | 1.761826 | 1.266455 | Non/De-CSC | Non/De-CSC    | yes                |
| 5                | 1.749786         | 2.117801 | 1.244752 | Non/De-CSC | Non/De-CSC    | yes                |
| 6                | 1.819328         | 2.050408 | 1.299469 | Non/De-CSC | Non/De-CSC    | yes                |
| 7                | 1.798689         | 2.011638 | 1.312134 | Non/De-CSC | Non/De-CSC    | yes                |
| 8                | 1.892374         | 1.921637 | 1.348044 | Non/De-CSC | Non/De-CSC    | yes                |
| 9                | 1.900544         | 1.544735 | 1.320328 | Non/De-CSC | Non/De-CSC    | yes                |
| 10               | 1.834241         | 1.480186 | 1.268752 | Non/De-CSC | Non/De-CSC    | yes                |
| 11               | 1.775655         | 1.232072 | 1.228482 | Non/De-CSC | Non/De-CSC    | yes                |
| 12               | 1.713579         | 1.409896 | 1.223249 | Non/De-CSC | Non/De-CSC    | yes                |
| 13               | 1.728734         | 1.688588 | 1.212232 | Non/De-CSC | Non/De-CSC    | yes                |
| 14               | 1.680008         | 1.203106 | 1.238495 | Non/De-CSC | Non/De-CSC    | yes                |
| 15               | 1.845183         | 1.523259 | 1.344059 | Non/De-CSC | Non/De-CSC    | yes                |
| 16               | 1.864388         | 1.679419 | 1.366456 | Non/De-CSC | Non/De-CSC    | yes                |
| 17               | 2.339016         | 17.37641 | 1.668717 | CSC        | CSC           | yes                |
| 18               | 2.204321         | 10.25706 | 1.532161 | CSC        | CSC           | yes                |
| 19               | 2.183013         | 11.51956 | 1.562858 | CSC        | CSC           | yes                |
| 20               | 2.130075         | 9.966903 | 1.530473 | CSC        | CSC           | yes                |
| 21               | 2.184406         | 10.11168 | 1.545874 | CSC        | CSC           | yes                |
| 22               | 2.097712         | 8.286319 | 1.626988 | CSC        | CSC           | yes                |

|    |          |          |          |     |     |     |
|----|----------|----------|----------|-----|-----|-----|
| 23 | 2.22251  | 8.583179 | 1.659878 | CSC | CSC | yes |
| 24 | 2.277516 | 13.40781 | 1.727029 | CSC | CSC | yes |

**Table S9. Identification of three unknown CSC mixtures in S1 system from the training set (Figure 4b and Table S3).** The results show an overall 100% correct unknown identification.

| Unknown sample # | I/I <sub>0</sub> |          |          | True ID  | Identified as | Correct prediction |
|------------------|------------------|----------|----------|----------|---------------|--------------------|
|                  | EBFP             | EGFP     | tdTomato |          |               |                    |
| 1                | 1.803439         | 1.562091 | 1.352891 | 0% CSC   | 0% CSC        | yes                |
| 2                | 1.79796          | 1.503799 | 1.363111 | 0% CSC   | 0% CSC        | yes                |
| 3                | 1.778555         | 1.421646 | 1.273746 | 0% CSC   | 0% CSC        | yes                |
| 4                | 1.764604         | 1.506237 | 1.287965 | 0% CSC   | 0% CSC        | yes                |
| 5                | 1.851735         | 1.399424 | 1.289832 | 0% CSC   | 0% CSC        | yes                |
| 6                | 1.74576          | 1.334019 | 1.319181 | 0% CSC   | 0% CSC        | yes                |
| 7                | 1.842817         | 1.58972  | 1.356863 | 0% CSC   | 0% CSC        | yes                |
| 8                | 1.887588         | 1.710484 | 1.326241 | 0% CSC   | 0% CSC        | yes                |
| 9                | 2.57129          | 10.09375 | 1.634484 | 50% CSC  | 50% CSC       | yes                |
| 10               | 2.515968         | 10.89496 | 1.599549 | 50% CSC  | 50% CSC       | yes                |
| 11               | 2.558933         | 9.360174 | 1.599581 | 50% CSC  | 50% CSC       | yes                |
| 12               | 2.516355         | 8.433984 | 1.592995 | 50% CSC  | 50% CSC       | yes                |
| 13               | 2.420688         | 8.567795 | 1.648032 | 50% CSC  | 50% CSC       | yes                |
| 14               | 2.435266         | 10.51007 | 1.540313 | 50% CSC  | 50% CSC       | yes                |
| 15               | 2.459633         | 10.61531 | 1.573778 | 50% CSC  | 50% CSC       | yes                |
| 16               | 2.481606         | 10.32127 | 1.569332 | 50% CSC  | 50% CSC       | yes                |
| 17               | 2.513698         | 21.0672  | 1.642772 | 100% CSC | 100% CSC      | yes                |
| 18               | 2.516317         | 20.6477  | 1.629466 | 100% CSC | 100% CSC      | yes                |
| 19               | 2.435207         | 21.76076 | 1.622545 | 100% CSC | 100% CSC      | yes                |
| 20               | 2.36229          | 22.52546 | 1.518622 | 100% CSC | 100% CSC      | yes                |
| 21               | 2.459088         | 22.3944  | 1.623563 | 100% CSC | 100% CSC      | yes                |
| 22               | 2.41154          | 21.15326 | 1.605775 | 100% CSC | 100% CSC      | yes                |
| 23               | 2.438052         | 22.59211 | 1.625857 | 100% CSC | 100% CSC      | yes                |
| 24               | 2.524149         | 21.07948 | 1.667968 | 100% CSC | 100% CSC      | yes                |

**Table S10. Identification of unknown PDX samples from the training set (Figure 5c and Table S4) using BenzNP-FP nanosensor.** The results show 100% accurate unknown identification.

| Unknown sample # | I/I <sub>0</sub> |          |          | True ID | Identified as | Correct prediction |
|------------------|------------------|----------|----------|---------|---------------|--------------------|
|                  | EBFP             | EGFP     | tdTomato |         |               |                    |
| 1                | 1.566597         | 0.849864 | 1.321603 | Non-CSC | Non-CSC       | yes                |
| 2                | 1.551777         | 0.914188 | 1.290197 | Non-CSC | Non-CSC       | yes                |
| 3                | 1.537542         | 0.939296 | 1.2961   | Non-CSC | Non-CSC       | yes                |
| 4                | 1.488406         | 0.893524 | 1.287482 | Non-CSC | Non-CSC       | yes                |

|    |          |          |          |         |         |     |
|----|----------|----------|----------|---------|---------|-----|
| 5  | 1.566868 | 0.888473 | 1.300348 | Non-CSC | Non-CSC | yes |
| 6  | 1.613927 | 0.883811 | 1.323813 | Non-CSC | Non-CSC | yes |
| 7  | 1.703125 | 0.979484 | 1.374356 | Non-CSC | Non-CSC | yes |
| 8  | 1.667582 | 0.961879 | 1.375677 | Non-CSC | Non-CSC | yes |
| 9  | 1.784828 | 1.09145  | 1.406615 | Non-CSC | Non-CSC | yes |
| 10 | 1.738162 | 1.153031 | 1.358105 | Non-CSC | Non-CSC | yes |
| 11 | 1.724078 | 1.617118 | 1.566202 | CSC     | CSC     | yes |
| 12 | 1.792467 | 1.799601 | 1.626918 | CSC     | CSC     | yes |
| 13 | 1.710386 | 1.515836 | 1.649519 | CSC     | CSC     | yes |
| 14 | 1.846764 | 1.683434 | 1.700884 | CSC     | CSC     | yes |
| 15 | 1.812834 | 2.002943 | 1.553019 | CSC     | CSC     | yes |

### 8. Importance of each fluorescent channel

To further evaluate the importance of each FP channel in our sensor, identification of unknowns using individual FP were carried out. As shown in Figure S9-10, each channel contributes to the identification to certain extent. However, when combined all together, it reaches the highest identification accuracy.

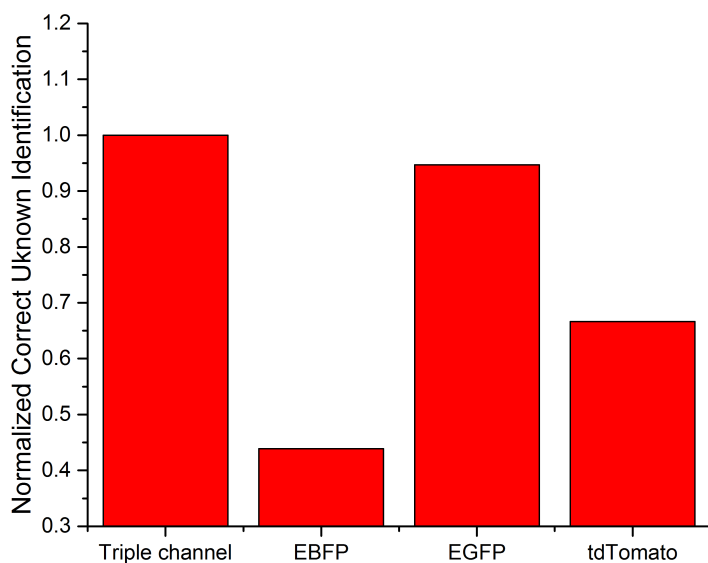

**Figure S9.** Correct unknown identification (CUI) of blinded cell mixture samples from the MCF-10A ER-Src system using either three FP or individual FP channel. Mixtures were in 0, 20, 50, 75 or 100% CSC. CUI was normalized to the percentage from the triple channel, which provides the highest identification accuracy.



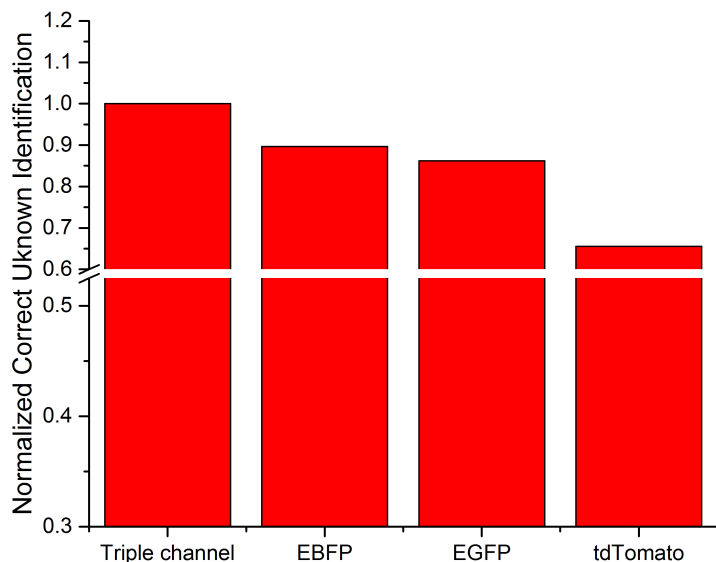

**Figure S10.** Correct unknown identification (CUI) of blinded cell mixture samples from the S1 system using either three FP or individual FP. Mixtures were in 0, 20, 50, 75 or 100% CSC. CUI was normalized to the percentage from the triple channel, which provides the highest identification accuracy.

## References

1. Tonga, G. Y., Jeong, Y., Duncan, B., Mizuhara, T., Mout, R., Das, R., Kim, S. T., Yeh, Y.-C., Yan, B., Hou, S., and Rotello, V. M. (2015) Supramolecular regulation of bioorthogonal catalysis in cells using nanoparticle-embedded transition metal catalysts. *Nat. Chem.* **7**, 597–603
2. Tonga, G. Y., Mizuhara, T., Saha, K., Jiang, Z., Hou, S., Das, R., and Rotello, V. M. (2015) Binding studies of cucurbit[7]uril with gold nanoparticles bearing different surface functionalities. *Tetrahedron Lett.* **56**, 3653–3657
3. Kim, C., Tonga, G. Y., Yan, B., Kim, C. S., Kim, S. T., Park, M. H., Zhu, Z., Duncan, B., Creran, B., and Rotello, V. M. (2015) Regulating exocytosis of nanoparticles via host-guest chemistry. *Org. Biomol. Chem.* **13**, 2474–2479
4. Rana, S., Le, N. D. B., Mout, R., Saha, K., Tonga, G. Y., Bain, R. E. S., Miranda, O. R., Rotello, C. M., and Rotello, V. M. (2015) A multichannel nanosensor for instantaneous readout of cancer drug mechanisms. *Nat. Nanotechnol.* **10**, 65–69
5. Kanaras, A. G., Kamounah, F. S., Schaumburg, K., Kiely, C. J., and Brust, M. (2002) Thioalkylated tetraethylene glycol: a new ligand for water soluble monolayer protected gold clusters. *Chem. Commun.* **20**, 2294–2295
6. Brust, M., Walker, M., Bethell, D., Schiffrin, D. J., and Whyman, R. (1994) Synthesis of thiol derivatised gold nanoparticles in a two-phase Liquid–Liquid system. *J. Chem. Soc. Chem. Commun.* 801–802
7. Templeton, A. C., Wuelfing, W. P., and Murray, R. W. (2000) Monolayer-protected cluster molecules. *Acc. Chem. Res.* **33**, 27–36

- 
8. Yan, B., Zhu, Z. J., Miranda, O. R., Chompoosor, A., Rotello, V. M., and Vachet, R. W. (2009) Laser desorption/ionization mass spectrometry analysis of monolayer-protected gold nanoparticles. *Anal. Bioanal. Chem.* **396**, 1025–1035
  9. Rana, S., Singla, A. K., Bajaj, A., Elci, S. G., Miranda, O. R., Mout, R., Yan, B., Jirik, F. R., and Rotello, V. M. (2012) Array-based sensing of metastatic cells and tissues using nanoparticle-fluorescent protein conjugates. *ACS Nano.* **6**, 8233–8240
  10. R Development Core Team (2010). *R: A language and environment for statistical computing*. R Foundation for Statistical Computing, Vienna, Austria. ISBN 3-900051-07-0, URL <http://www.Rproject.org>.
  11. Mahalanobis, P. C. (1936) On the generalized distance in statistics. *Proc. Natl. Inst. Sci. India.* **2**, 49–55
  12. Gnanadesikan, R., and Kettenring, J. R. (1972) Robust estimates, residuals, and outlier detection with multiresponse data. *Biometrics* **28**, 81–124
